# Supplementary material for: Detection of Invasive Mosquito Vectors Using Environmental DNA (eDNA) from Water Samples
Source: PLoS One. 2016 Sep 14;11(9):e0162493. doi: 10.1371/journal.pone.0162493 (PMC5023106; doi:10.1371/journal.pone.0162493)
Supplement: S3 Table — (XLS) [file pone.0162493.s005.xls]

## Sheet: Blatt 1 - Tabelle 1 - Tabelle 1
			Family	Culicidae	Culicidae	Culicidae	Culicidae
Sample ID	Total number of sequences before filtering per sample	Total number of sequences after filtering per sample	Taxon	Aedes albopictus	Aedes j. japonicus	Aedes koreicus	Culex spp.
AL1	157877	106597					106597
AL2	176023	0
BA1	240231	145654		59			145595
BA2	84016	43564					43564
BA3	102048	58123		2597			55526
CH1	112642	76813			49248		27565
CH2	79263	57822			57822
CH4	92566	62479					62479
CH6	116357	71868		24			71844
CH7	164906	120064		119559		238	267
CH8	73204	49534		9253		40281
CH9	125979	67938		343		67572	23
CH10	188358	115358					115358
CH12	119662	84483			35633		48850
CH14	152516	0
CH15	186385	89310			4580		84730
CH16	130478	10686			10686
CH18	279526	220794			220794
CH19	188555	93881			88769		5112
DE2	54005	34062			5445		28617
DE3	48360	32821			80		32741
DE4	73075	48434					48434
DE5	120402	81546			14297		67249
ES1	52043	39949		39949
ES3	138052	108300		108300
FR4	209790	0
FR5	210286	36996		36996
FR6	60781	26157					26157
IT2	142442	95539		95507			32
IT3	104469	30				30
IT4	72821	47093				115	46978
IT5	176239	0
IT6	131545	93779		93779
IT10	253410	147784		147784
Total	4618312	2267458		654150	487354	108236	1017718
